# Supplementary material for: Cohesive bond strength of marine aggregates and its role in fragmentation
Source: Frontiers journal article supplement (doi:10.3389/fmars.2023.1167169), 2023-08-25
Supplement: Data_Sheet_1.pdf [file Data_Sheet_1.pdf]

# Cohesive Bond Strength of Marine Aggregates and its Role in Fragmentation

Yasuhito Hayashi<sup>1</sup>, Shigeki Wada<sup>1</sup>, Mayumi Seto<sup>2</sup>, Yasuhisa Adachi<sup>3</sup>

<sup>1</sup>Shimoda Marine Research Center, University of Tsukuba, Shimoda, Shizuoka, Japan

<sup>2</sup>Department of Chemistry, Biology, and Environmental Sciences, Nara Women's University, Kita-Uoya Nishimachi, Nara, Japan

<sup>3</sup>Faculty of Life and Environmental Sciences, University of Tsukuba, Tsukuba, Ibaraki, Japan

**\* Correspondence:**

Shigeki Wada

swadasbm@shimoda.tsukuba.ac.jp

Table S1 Parameters to calculate cohesive strength

$D_{99}$ ,  $D_{99F}$  and  $D_{99L}$  indicate 99% cumulative size from whole, former and latter period of plateau phase, respectively.

| Day | rpm | shear | $D_{99}$ | $D_{99F}$ | $D_{99L}$ | Ratio | $S$  | $F_{hyd}$ | $F_{coh}$ |
|-----|-----|-------|----------|-----------|-----------|-------|------|-----------|-----------|
| 2   | 7   | 3.37  | 6840     | 6854      | 5770      | 2.01  | 62.4 | 126       | 42.0      |
| 2   | 15  | 7.23  | 5170     | 5064      | 5364      | 1.07  | 43.0 | 186       | 62.0      |
| 2   | 22  | 10.6  | 3801     | 3832      | 3789      | 1.70  | 23.4 | 149       | 49.6      |
| 2   | 47  | 22.6  | 3312     | 3295      | 3292      | 2.10  | 13.9 | 189       | 63.0      |
| 4   | 7   | 3.37  | 8250     | 8461      | 8199      | 1.67  | 113  | 228       | 76.0      |
| 4   | 7   | 3.37  | 8201     | 7556      | 8603      | 1.75  | 105  | 212       | 70.8      |
| 4   | 15  | 7.23  | 5539     | 6109      | 5026      | 1.61  | 52.9 | 229       | 76.4      |
| 4   | 15  | 7.23  | 5540     | 5585      | 5474      | 1.58  | 54.2 | 235       | 78.2      |
| 4   | 22  | 10.6  | 5007     | 4923      | 5032      | 1.58  | 44.2 | 281       | 93.6      |
| 4   | 22  | 10.6  | 3871     | 3939      | 3817      | 1.64  | 25.2 | 160       | 53.4      |
| 4   | 47  | 22.6  | 2792     | 2819      | 2766      | 1.70  | 12.6 | 171       | 57.1      |
| 4   | 47  | 22.6  | 2983     | 3179      | 2809      | 1.79  | 13.5 | 184       | 61.2      |
| 6   | 7   | 3.37  | 9225     | 9266      | 9203      | 2.26  | 99.4 | 201       | 67.0      |
| 6   | 22  | 10.6  | 5331     | 5470      | 5180      | 1.60  | 49.3 | 313       | 104       |
| 6   | 22  | 10.6  | 4891     | 4985      | 4764      | 1.70  | 38.7 | 246       | 82.0      |
| 6   | 47  | 22.6  | 3753     | 3933      | 3585      | 1.62  | 24.2 | 328       | 109       |
| 6   | 47  | 22.6  | 4050     | 4123      | 4003      | 1.71  | 26.4 | 358       | 119       |

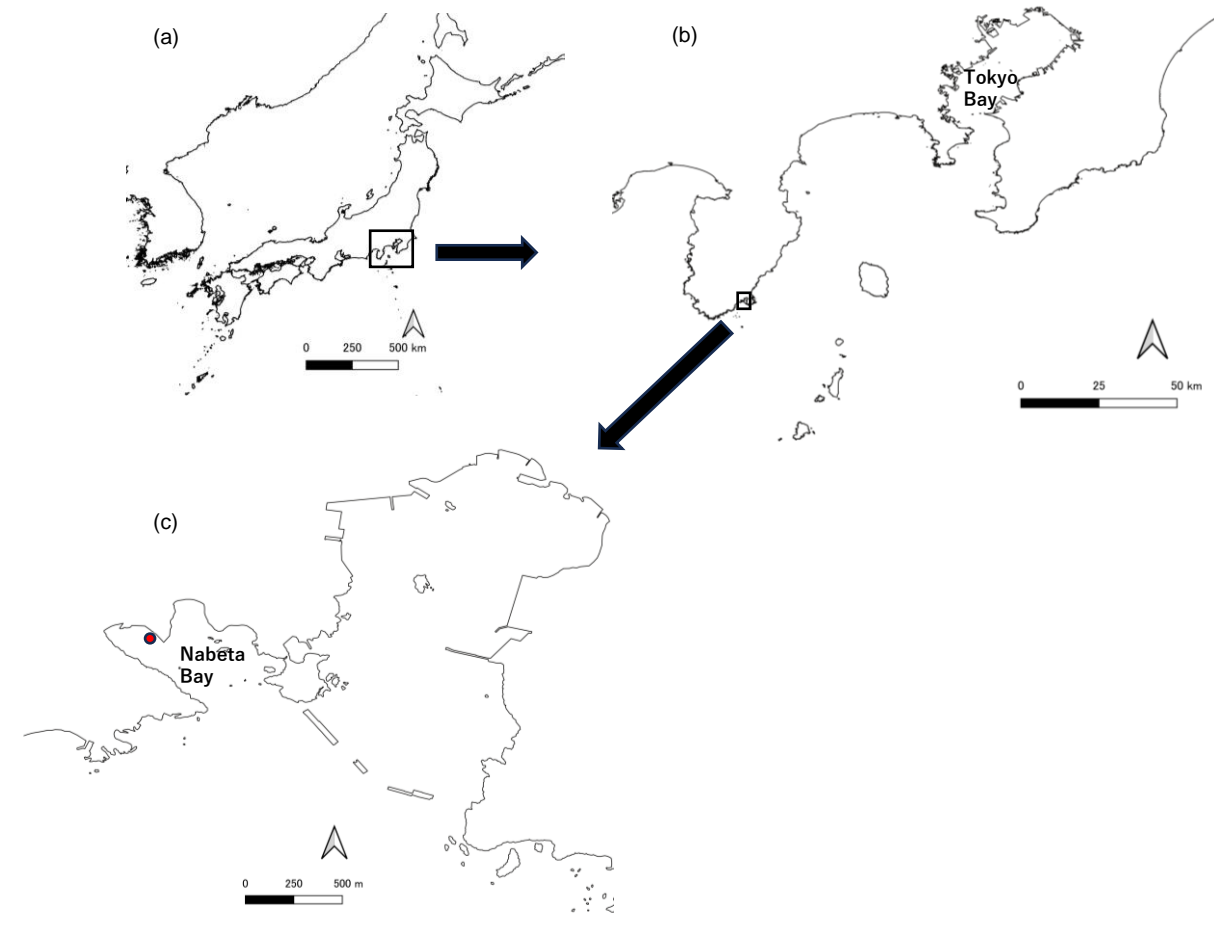

Fig. S1 Map of the study site

Circle in Nabeta bay is the location where we collected seawater for the experiment.

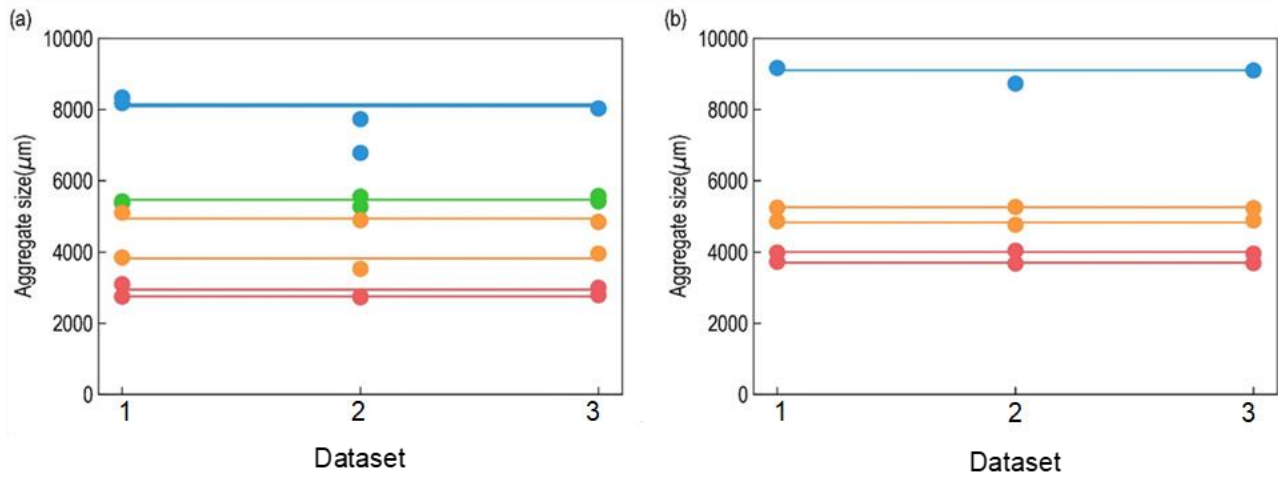

Fig. S2 D<sub>99</sub> values estimated from splitted and whole datasets.

Ordinate and abscissa are size of aggregates (D<sub>99</sub>: μm) and number of splitted dataset on day 4 (a) and 6 (b), respectively. Results from rotation speeds at 47 (red), 22 (orange), 15 (green) and 7 (blue) rpm were shown. The lines show calculated D<sub>99</sub> value using whole dataset.

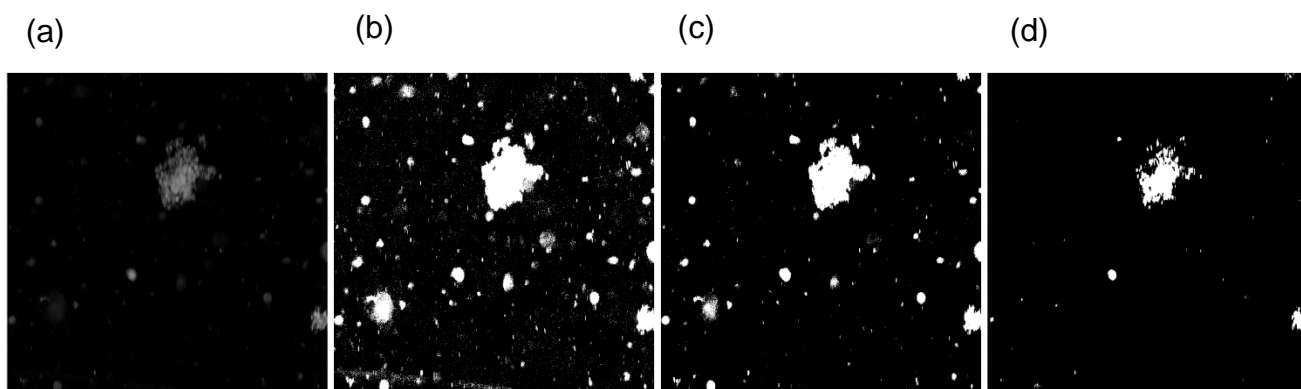

Fig. S3 Visualized images with the different level of binarization threshold

Raw images (a), threshold with 10 (b), 20 (c) and 60 (d) were shown.

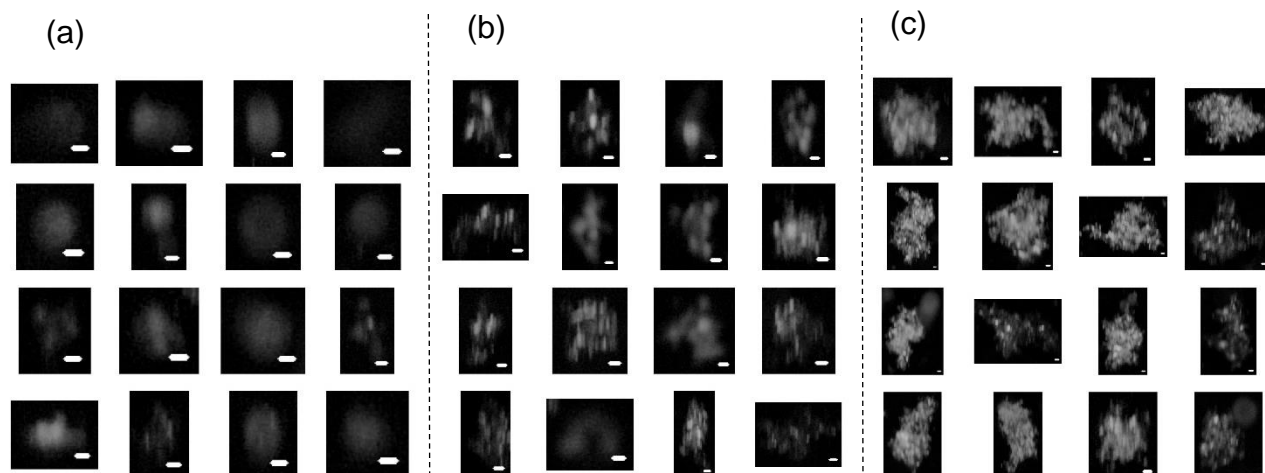

Fig. S4 Particles visualized in different size ranges

The images of particles in the ranges of 1000-2000 (a), 2000-5000 (b) and more than 5000 pixels (c) were shown. The scale bars showed 100 pixels.

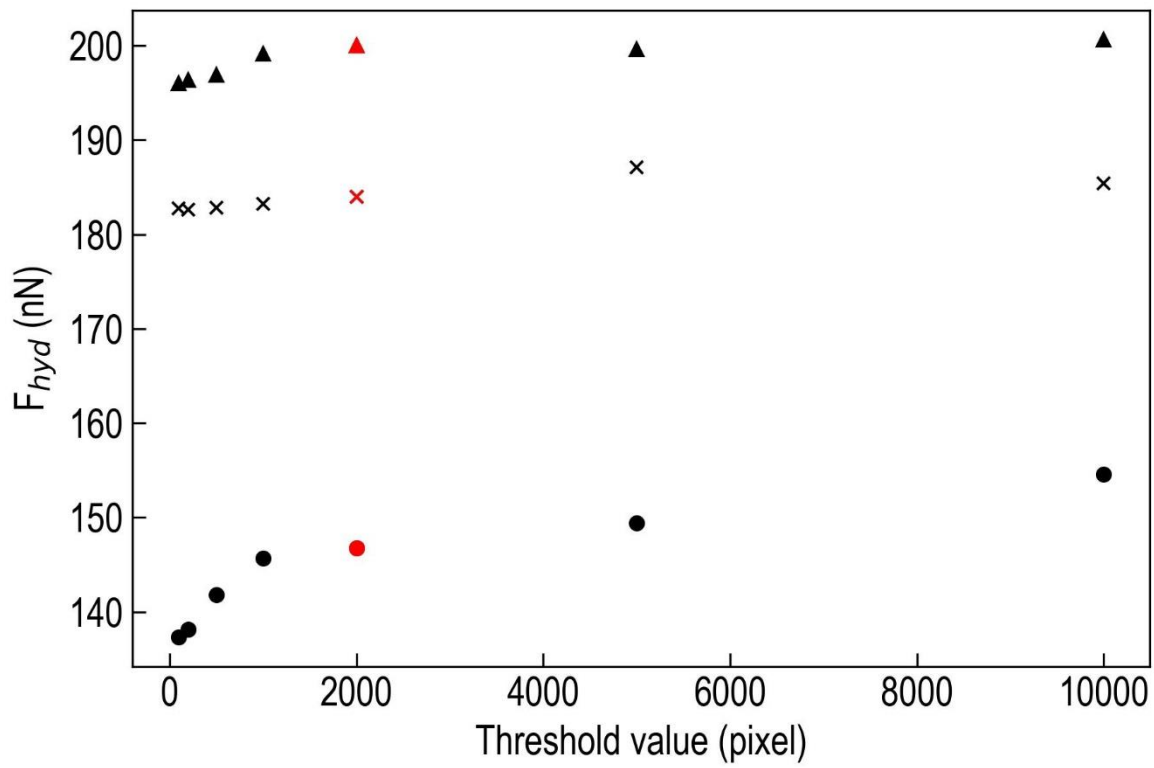

Fig. S5 Dependency of  $F_{hyd}$  on detection limit of visualization

Ordinate and abscissa are  $F_{hyd}$  (nN) and threshold of the detection limit (pixels). The data on day 2 (○), 4 (×) and 6 (△) were shown.

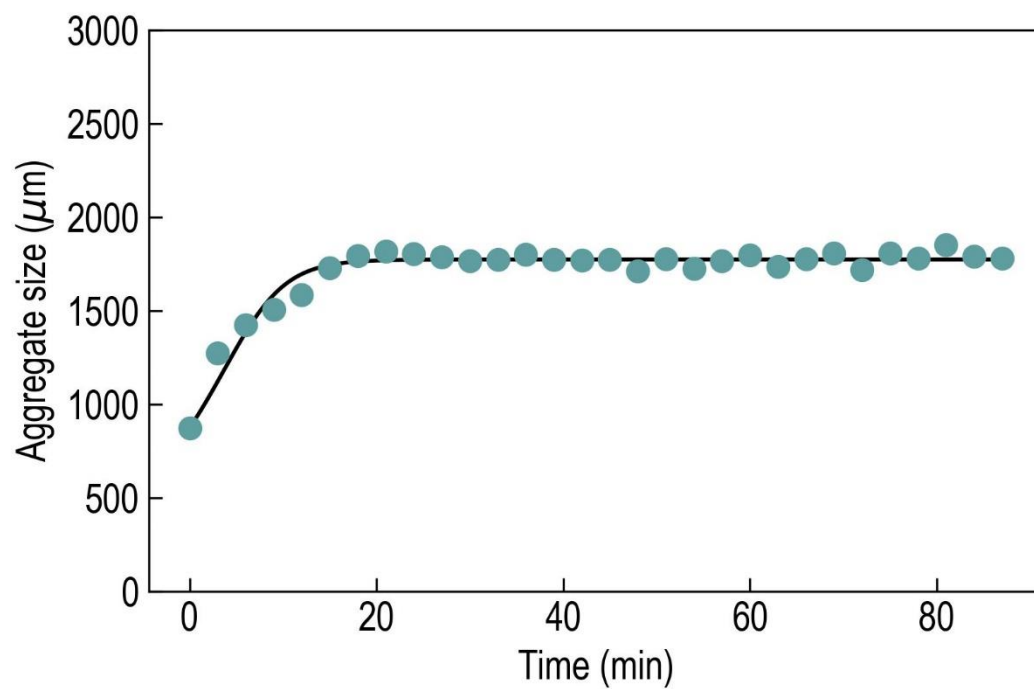

Fig. S6 A curve fitting for montmorillonite aggregate size vs time at a rotational speed of 7 rpm  
Ordinate and abscissa are size of aggregate ( $\mu\text{m}$ ) and time (min)
